# Supplementary material for: Pro-Health and Anti-Cancer Activity of Fungal Fractions Isolated from Milk-Supplemented Cultures of Lentinus (Pleurotus) Sajor-caju
Source: MDPI journal article supplement (doi:10.3390/biom11081089), 2021-07-23
Supplement: s1 [file s1]

Supplementary material

# Prohealth and anticancer activity of fungal fractions isolated from milk-supplemented cultures of *Pleurotus sajor-caju*

Adrian Zajac <sup>1,\*</sup>, Mateusz Pięt <sup>2</sup>, Dawid Stefaniuk <sup>3,\*</sup>, Michał Chojnacki <sup>4</sup>, Joanna Jakubowicz-Gil <sup>1</sup>, Roman Paduch <sup>2</sup> and Magdalena Jaszek <sup>3</sup>

<sup>1</sup> Department of Functional Anatomy and Cytobiology, Institute of Biological Sciences, Maria Curie-Skłodowska University, Lublin, Poland

<sup>2</sup> Department of Virology and Immunology, Institute of Biological Sciences, Maria Curie-Skłodowska University, Lublin, Poland

<sup>3</sup> Department of Biochemistry and Biotechnology, Institute of Biological Sciences, Maria Curie-Skłodowska University, Lublin, Poland

<sup>4</sup> Department of Experimental Hematooncology, Medical University of Lublin, Poland

\* Correspondence: adrian.zajac@poczta.umcs.lublin.pl; dawid.stefaniuk@poczta.umcs.lublin.pl

Table S1. Biochemical composition of the cow whole milk and the studied extracts of *Pleurotus sajor-caju*.

| Proteins [μg/mL]           |        |         |        |         |         |
|----------------------------|--------|---------|--------|---------|---------|
| Milk                       | PSC1-I | PSC1-II | PSC2-I | PSC3-II | PSC4-II |
| 523.3                      | 238.3  | 508.3   | 802.9  | 654.2   | 550.5   |
| ±                          | ±      | ±       | ±      | ±       | ±       |
| 5.3                        | 36.7   | 9.1     | 16.6   | 12.4    | 38.4    |
| Amino acids [μg/mL]        |        |         |        |         |         |
| Milk                       | PSC1-I | PSC1-II | PSC2-I | PSC3-II | PSC4-II |
| 509.5                      | 452.4  | 90.6    | 498.9  | 492.4   | 37.5    |
| ±                          | ±      | ±       | ±      | ±       | ±       |
| 0.7                        | 0.1    | 0.4     | 0.2    | 0.5     | 0.3     |
| Carbohydrates [μg/mL]      |        |         |        |         |         |
| Milk                       | PSC1-I | PSC1-II | PSC2-I | PSC3-II | PSC4-II |
| 69.5                       | 42.0   | 19.7    | 188.6  | 117.9   | 54.4    |
| ±                          | ±      | ±       | ±      | ±       | ±       |
| 0.1                        | 0.2    | 0.4     | 0.8    | 0.5     | 0.2     |
| Phenolic compounds [μg/mL] |        |         |        |         |         |
| Milk                       | PSC1-I | PSC1-II | PSC2-I | PSC3-II | PSC4-II |
| 0.0016                     | 0.0447 | 0.0175  | 1.9068 | 0.1749  | 1.9532  |
| ±                          | ±      | ±       | ±      | ±       | ±       |
| 0.0001                     | 0.0004 | 0.0003  | 0.0121 | 0.0043  | 0.0029  |
| Free radicals [%]          |        |         |        |         |         |
| Milk                       | PSC1-I | PSC1-II | PSC2-I | PSC3-II | PSC4-II |
| 0.446                      | 0.987  | 0.357   | 0.098  | 0.144   | 0.124   |
| ±                          | ±      | ±       | ±      | ±       | ±       |
| 0.003                      | 0.007  | 0.002   | 0.001  | 0.000   | 0.001   |

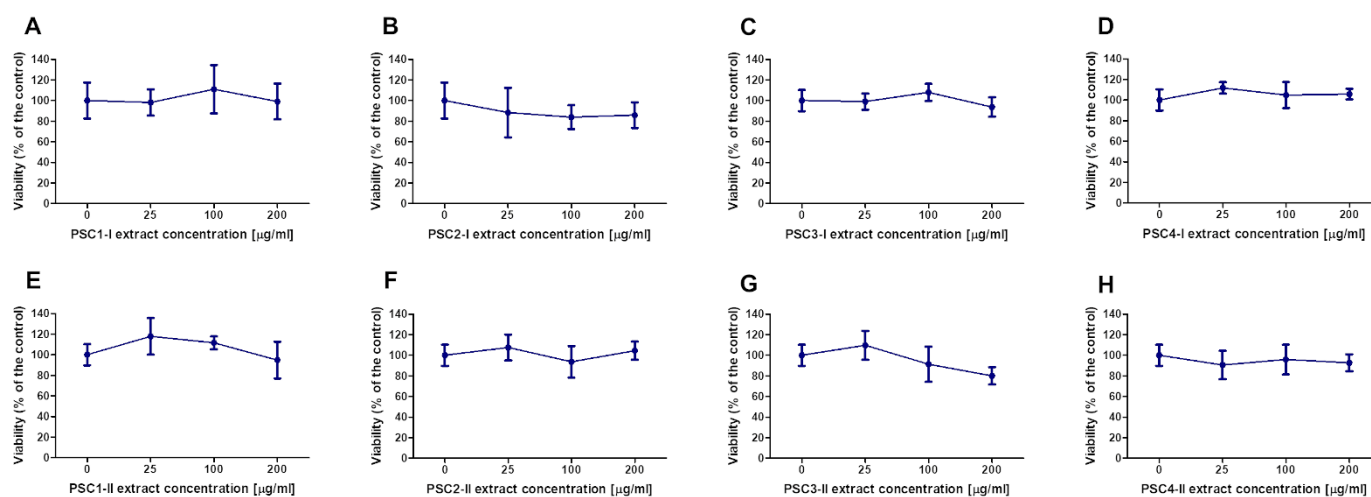

Figure S1. Results of screening PSC extracts on cells – cytotoxicity of PSC1-I (A), PSC2-I (B), PSC3-I (C), PSC4-I (D), PSC1-II (E), PSC2-II (F), PSC3-II (G), PSC4-II (H) on HT-29 cells measured with NR method. For the further analyses, PSC2-I, PSC3-II and PSC4-II were selected due to the strongest effect on HT-29 and the weakest cytotoxicity towards CCD 841 CoTr cell (not shown).

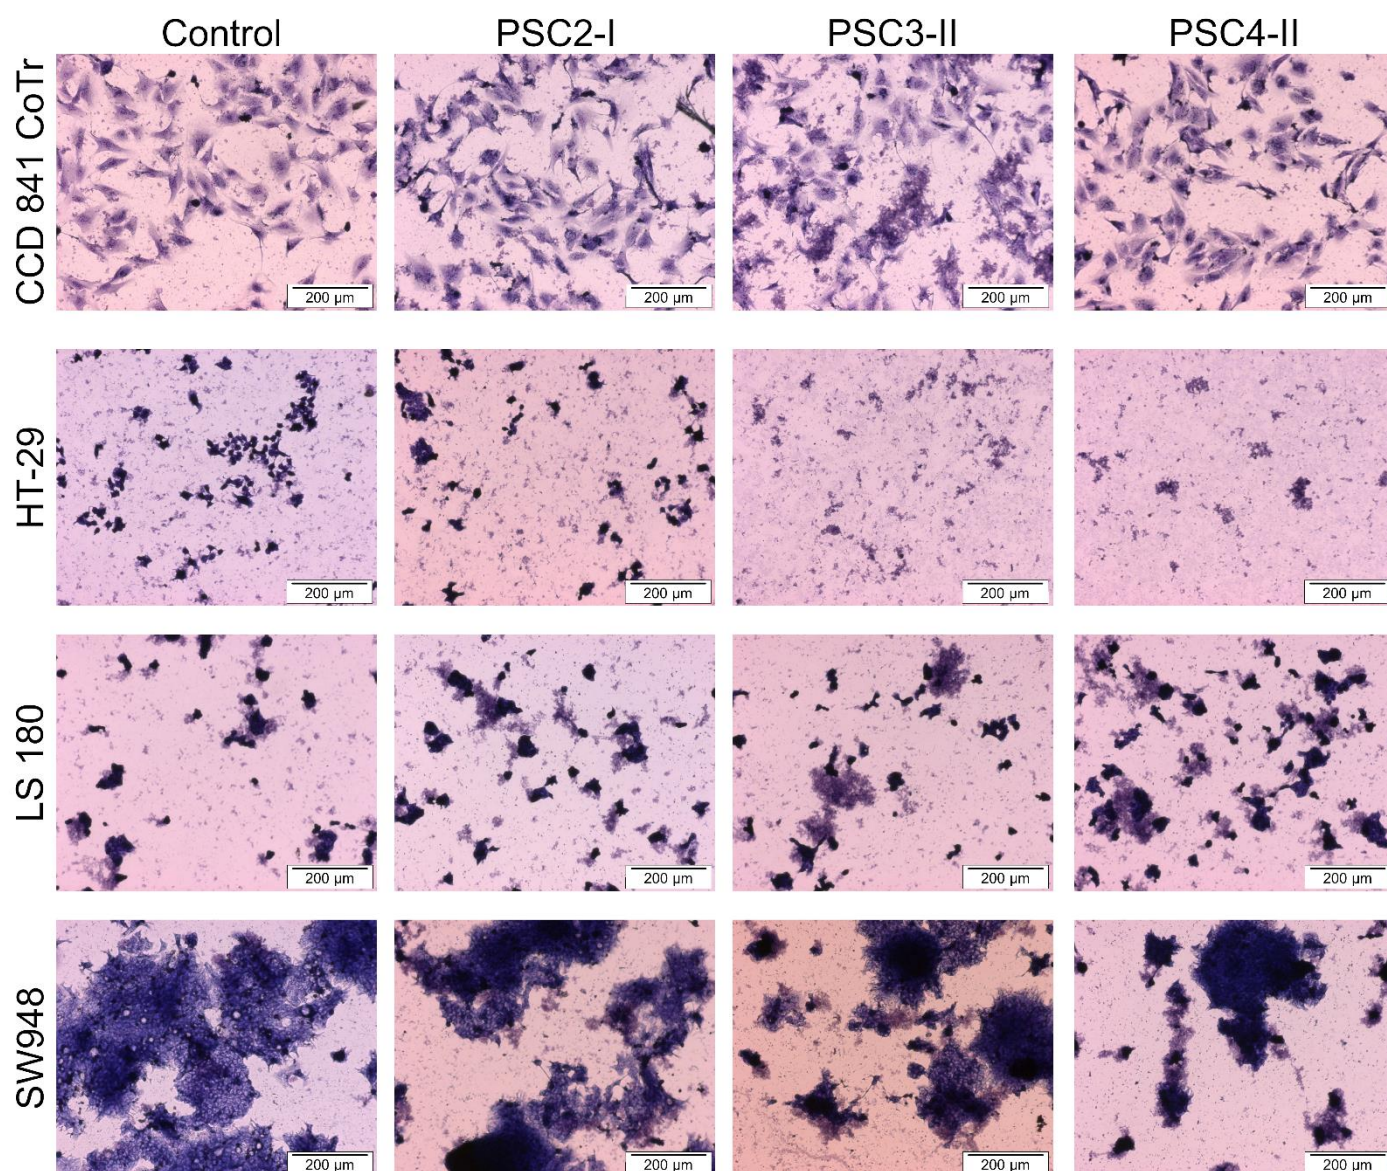

Figure S2. Anti-cancer effect of the PSC2-I, PSC3-II and PSC4-II extracts on CCD 841 CoTr, HT-29, LS 180 and SW948 cells: effect of the extracts on cell morphology – May-Grünwald- Giemsa staining.



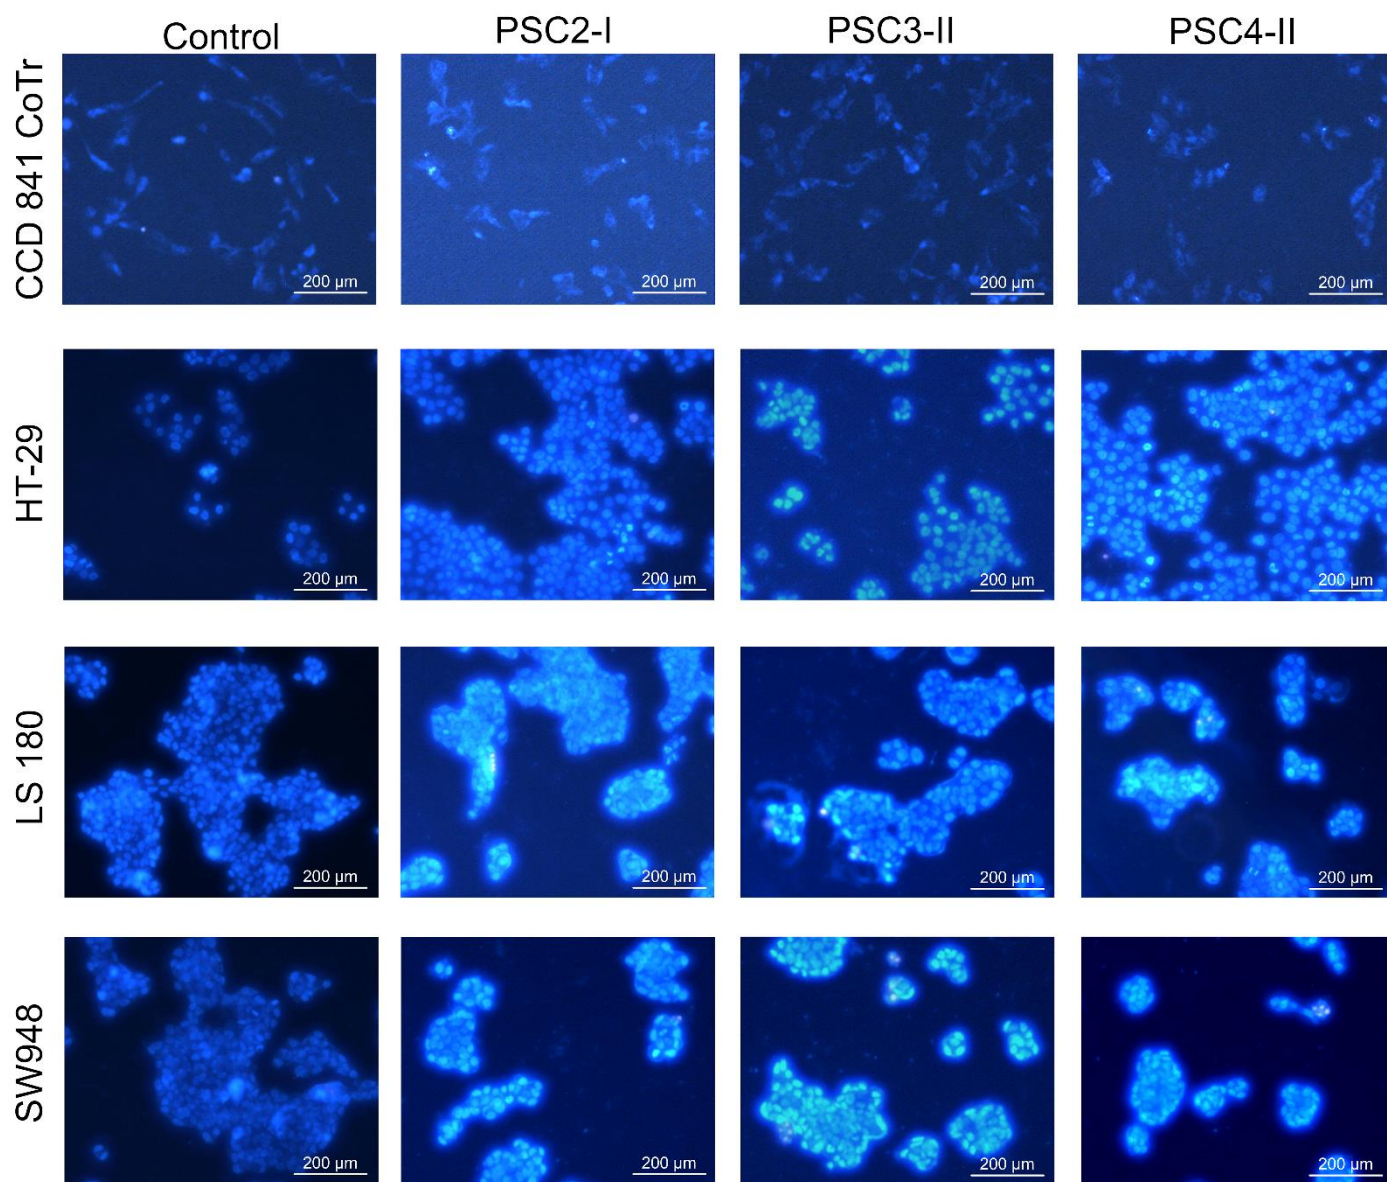

Figure S3. Anti-cancer effect of the PSC2-I, PSC3-II and PSC4-II extracts on CCD 841 CoTr, HT-29, LS 180 and SW948 cells: pro-apop-totic effect of the extracts.

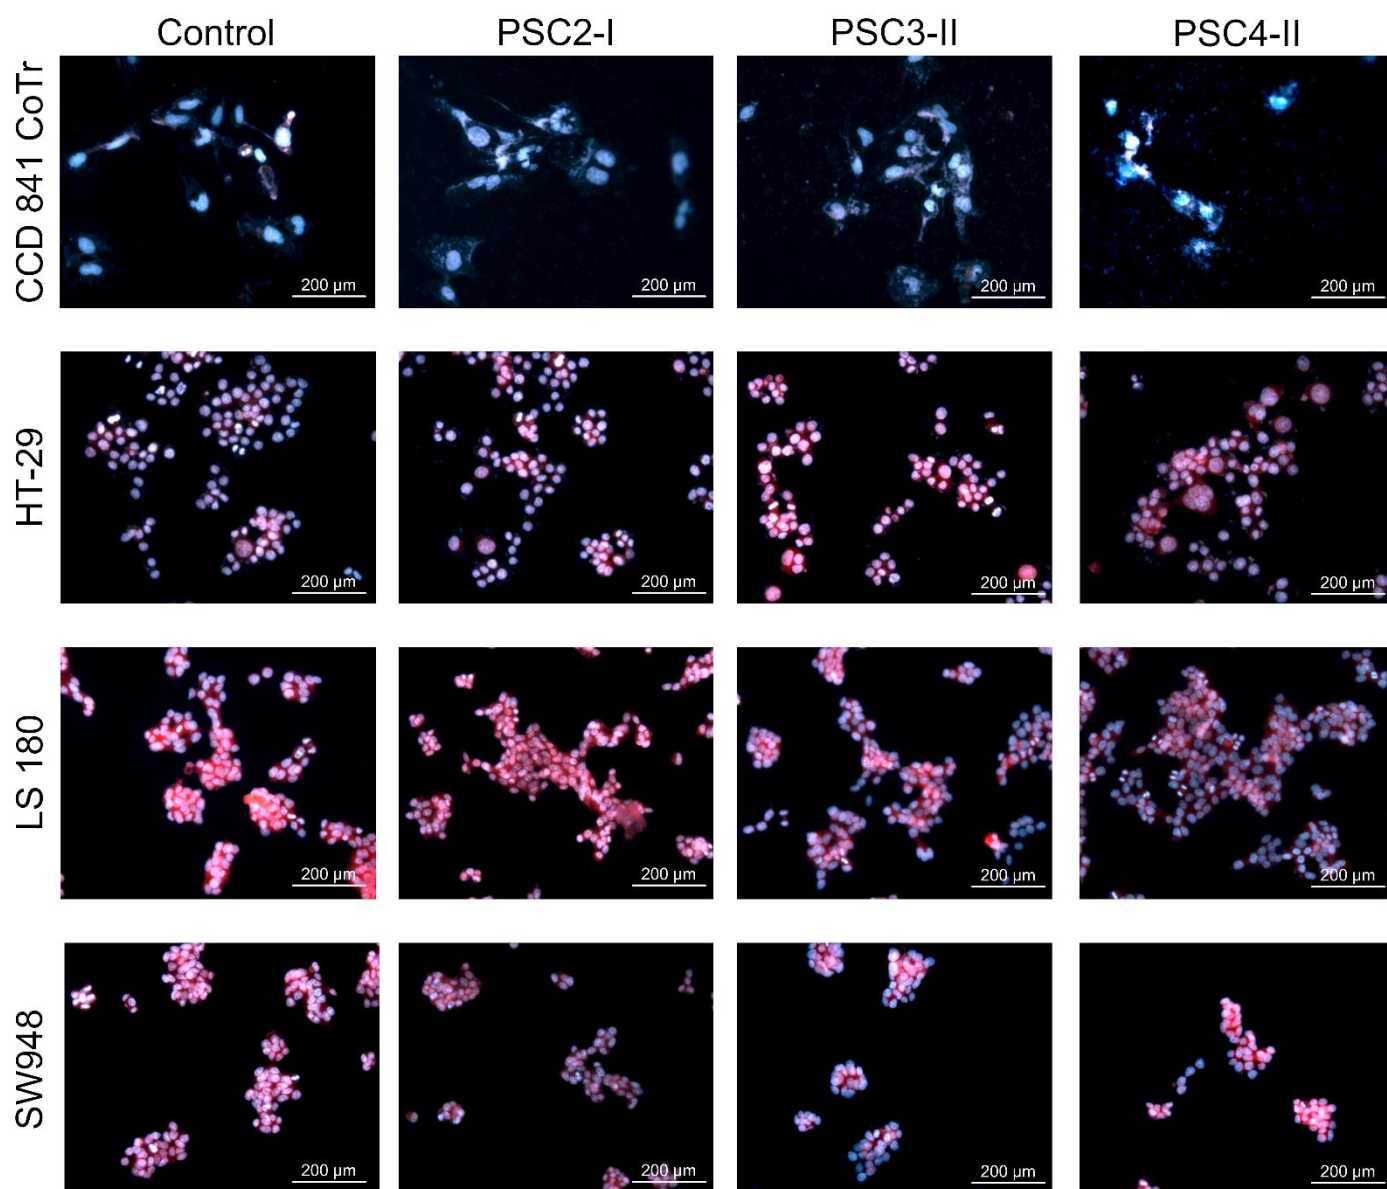

Figure S4. Anti-cancer effect of the PSC2-I, PSC3-II and PSC4-II extracts on CCD 841 CoTr, HT-29, LS 180 and SW948 cells: effect on the morphology of the cells and level of the proteins measured with DAPI/SR101 staining.

Table S2. Concentration of the NO secreted by CCD 841 CoTr, HT-29, LS 180 and SW948 cells after incubation with PSC2-I extract, with and without pre-incubation with LPS.

|                 |        | PSC2-I  |          |           |           |
|-----------------|--------|---------|----------|-----------|-----------|
|                 |        | 0 µg/ml | 25 µg/ml | 100 µg/ml | 200 µg/ml |
| CCD 841<br>CoTr | LPS(-) | 0.000   | 0.000    | 0.030     | 0.147     |
|                 |        | ±       | ±        | ±         | ±         |
|                 |        | 0.000   | 0.000    | 0.052     | 0.127     |
|                 | LPS(+) | 0.000   | 0.000    | 0.022     | 0.044     |
|                 |        | ±       | ±        | ±         | ±         |
|                 |        | 0.000   | 0.000    | 0.038     | 0.038     |
| HT-29           | LPS(-) | 0.383   | 0.748    | 0.597     | 0.769     |
|                 |        | ±       | ±        | ±         | ±         |
|                 |        | 0.037   | 0.274    | 0.074     | 0.074     |
|                 | LPS(+) | 0.617   | 0.642    | 0.801     | 0.761     |
|                 |        | ±       | ±        | ±         | ±         |
|                 |        | 0.126   | 0.069    | 0.182     | 0.069     |
| LS180           | LPS(-) | 0.451   | 0.411    | 0.492     | 0.532     |
|                 |        | ±       | ±        | ±         | ±         |
|                 |        | 0.035   | 0.070    | 0.121     | 0.070     |
|                 | LPS(+) | 0.564   | 0.623    | 0.702     | 0.662     |
|                 |        | ±       | ±        | ±         | ±         |
|                 |        | 0.068   | 0.068    | 0.000     | 0.068     |
| SW948           | LPS(-) | 0.483   | 0.695    | 0.568     | 0.949     |
|                 |        | ±       | ±        | ±         | ±         |
|                 |        | 0.161   | 0.127    | 0.127     | 0.127     |
|                 | LPS(+) | 0.556   | 0.735    | 0.735     | 1.015     |
|                 |        | ±       | ±        | ±         | ±         |
|                 |        | 0.069   | 0.120    | 0.120     | 0.069     |

Table S3. Concentration of the NO secreted by CCD 841 CoTr, HT-29, LS 180 and SW948 cells after incubation with PSC3-II extract, with and without pre-incubation with LPS.

|                 |        | PSC3-II |          |           |           |
|-----------------|--------|---------|----------|-----------|-----------|
|                 |        | 0 µg/ml | 25 µg/ml | 100 µg/ml | 200 µg/ml |
| CCD 841<br>CoTr | LPS(-) | 0.000   | 0.000    | 0.000     | 0.000     |
|                 |        | ±       | ±        | ±         | ±         |
|                 |        | 0.000   | 0.000    | 0.000     | 0.000     |
|                 | LPS(+) | 0.000   | 0.000    | 0.000     | 0.000     |
|                 |        | ±       | ±        | ±         | ±         |
|                 |        | 0.000   | 0.000    | 0.000     | 0.000     |
| HT-29           | LPS(-) | 0.383   | 0.297    | 0.340     | 0.468     |
|                 |        | ±       | ±        | ±         | ±         |
|                 |        | 0.037   | 0.000    | 0.197     | 0.074     |
|                 | LPS(+) | 0.617   | 0.562    | 0.483     | 0.721     |
|                 |        | ±       | ±        | ±         | ±         |
|                 |        | 0.126   | 0.069    | 0.000     | 0.119     |
| LS180           | LPS(-) | 0.451   | 0.411    | 0.208     | 0.370     |
|                 |        | ±       | ±        | ±         | ±         |
|                 |        | 0.035   | 0.185    | 0.140     | 0.121     |
|                 | LPS(+) | 0.564   | 0.702    | 0.427     | 0.505     |
|                 |        | ±       | ±        | ±         | ±         |
|                 |        | 0.068   | 0.312    | 0.068     | 0.136     |
| SW948           | LPS(-) | 0.483   | 0.355    | 0.271     | 0.440     |
|                 |        | ±       | ±        | ±         | ±         |
|                 |        | 0.161   | 0.147    | 0.073     | 0.127     |
|                 | LPS(+) | 0.556   | 0.496    | 0.456     | 0.536     |
|                 |        | ±       | ±        | ±         | ±         |
|                 |        | 0.069   | 0.120    | 0.069     | 0.069     |

Table S4. Concentration of the NO secreted by CCD 841 CoTr, HT-29, LS 180 and SW948 cells after incubation with PSC4-II extract, with and without pre-incubation with LPS.

|                 |        | PSC4-II |          |           |           |
|-----------------|--------|---------|----------|-----------|-----------|
|                 |        | 0 µg/ml | 25 µg/ml | 100 µg/ml | 200 µg/ml |
| CCD 841<br>CoTr | LPS(-) | 0.000   | 0.000    | 0.074     | 0.104     |
|                 |        | ±       | ±        | ±         | ±         |
|                 |        | 0.000   | 0.000    | 0.127     | 0.111     |
|                 | LPS(+) | 0.000   | 0.000    | 0.000     | 0.022     |
|                 |        | ±       | ±        | ±         | ±         |
|                 |        | 0.000   | 0.000    | 0.000     | 0.038     |
| HT-29           | LPS(-) | 0.383   | 0.554    | 0.597     | 0.683     |
|                 |        | ±       | ±        | ±         | ±         |
|                 |        | 0.037   | 0.000    | 0.074     | 0.124     |
|                 | LPS(+) | 0.617   | 0.681    | 0.721     | 1.357     |
|                 |        | ±       | ±        | ±         | ±         |
|                 |        | 0.126   | 0.069    | 0.119     | 0.383     |
| LS180           | LPS(-) | 0.451   | 0.411    | 0.492     | 0.653     |
|                 |        | ±       | ±        | ±         | ±         |
|                 |        | 0.035   | 0.070    | 0.000     | 0.070     |
|                 | LPS(+) | 0.564   | 0.780    | 0.702     | 0.780     |
|                 |        | ±       | ±        | ±         | ±         |
|                 |        | 0.068   | 0.180    | 0.312     | 0.068     |
| SW948           | LPS(-) | 0.483   | 0.398    | 0.568     | 0.630     |
|                 |        | ±       | ±        | ±         | ±         |
|                 |        | 0.161   | 0.147    | 0.127     | 0.090     |
|                 | LPS(+) | 0.556   | 0.656    | 0.576     | 0.895     |
|                 |        | ±       | ±        | ±         | ±         |
|                 |        | 0.069   | 0.069    | 0.183     | 0.069     |
